# Supplementary material
Source: publisher figshare collection journal article supplement (https://acs.figshare.com/ndownloader/files/4096930)

Supplementary Table 1. Statistics for a structural ensemble of 20 lowest-energy structures of *Plodia interpunctella* N- $\beta$ GRP (residue 6-118).

|                                           |                   |
|-------------------------------------------|-------------------|
| Total constraints                         | 1,584             |
| NOEs                                      | 1,408             |
| Intraresidue ( $ i-j  = 0$ )              | 98                |
| Sequential ( $ i-j  = 1$ )                | 299               |
| Medium-range ( $2 \leq  i-j  \leq 4$ )    | 167               |
| Long-range ( $ i-j  > 4$ )                | 844               |
| Dihedral constraints                      | 106               |
| Hydrogen bonds                            | 35                |
| Lennard-Jones potential energy (kcal/mol) | $-192.0 \pm 16.9$ |
| Number of violations                      |                   |
| NOE $> 0.5 \text{ \AA}$                   | 0                 |
| Dihedral $> 5^\circ$                      | 0                 |
| Coordinate precision ( $\text{\AA}$ )     |                   |
| Residues 6-118                            |                   |
| Backbone                                  | $1.62 \pm 0.42$   |
| All non-hydrogen atoms                    | $1.95 \pm 0.37$   |
| Residues 7-106                            |                   |
| Backbone                                  | $0.51 \pm 0.08$   |
| All non-hydrogen atoms                    | $1.31 \pm 0.11$   |

Supplementary Figure 1. MALDI mass spectrum of laminarin. The data were acquired on a Bruker Ultraflex II MALDI-TOF mass spectrometer (Bremen, Germany). 2,5-dihydroxybenzoic acid (DHB) was used as a matrix. The instrument was operated in a positive ion mode.

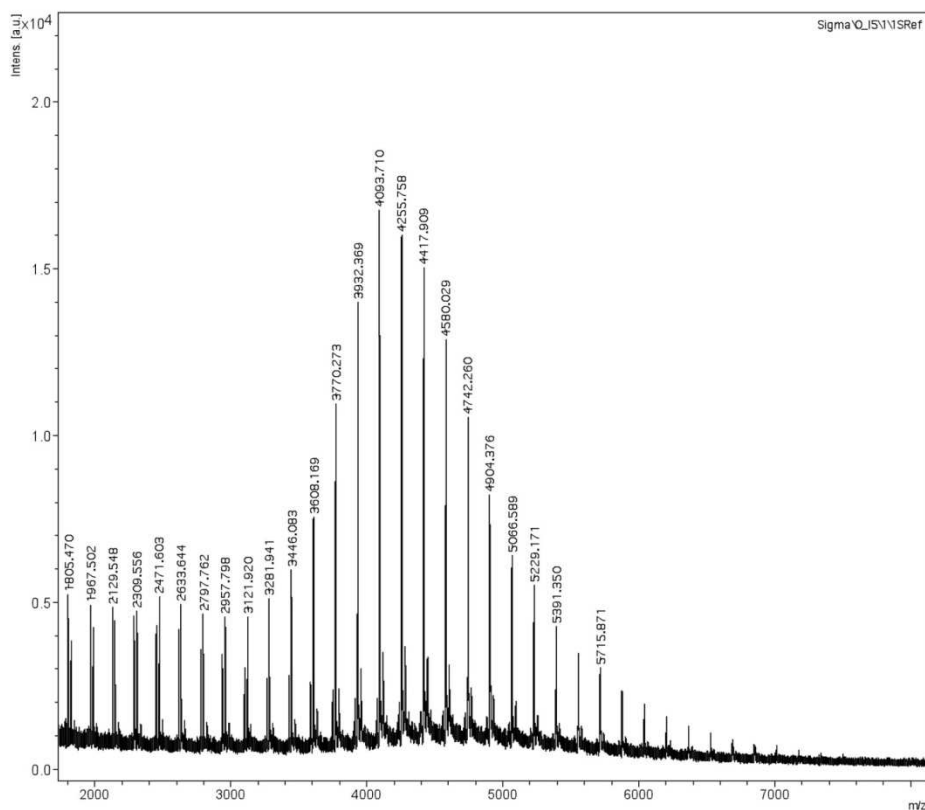

Supplementary Figure 2.  $\beta$ -1,3-glucan-binding activities of N- $\beta$ GRP and mutants as measured by curdlan pull-down assay and isothermal titration calorimetry. (A) SDS-PAGE of purified recombinant N- $\beta$ GRP proteins before and after co-precipitation with curdlan: purified wide type (lane 1), unbound (lane 2), and bound (lane 3); purified D45A mutant (lane 4), unbound (lane 5), and bound (lane 6); purified D45K mutant (lane 7), unbound (lane 8), and bound (lane 9). (B-D) Isothermal titration of laminarin with N- $\beta$ GRP wild type (B), D45A (C) and D45K (D). The protein concentrations were  $\sim 78 \mu\text{M}$  and the ligand (injectant) concentration was 1.67 mM, in a buffer containing 50 mM Tris-HCl (pH 7.5) and 50 mM NaCl.

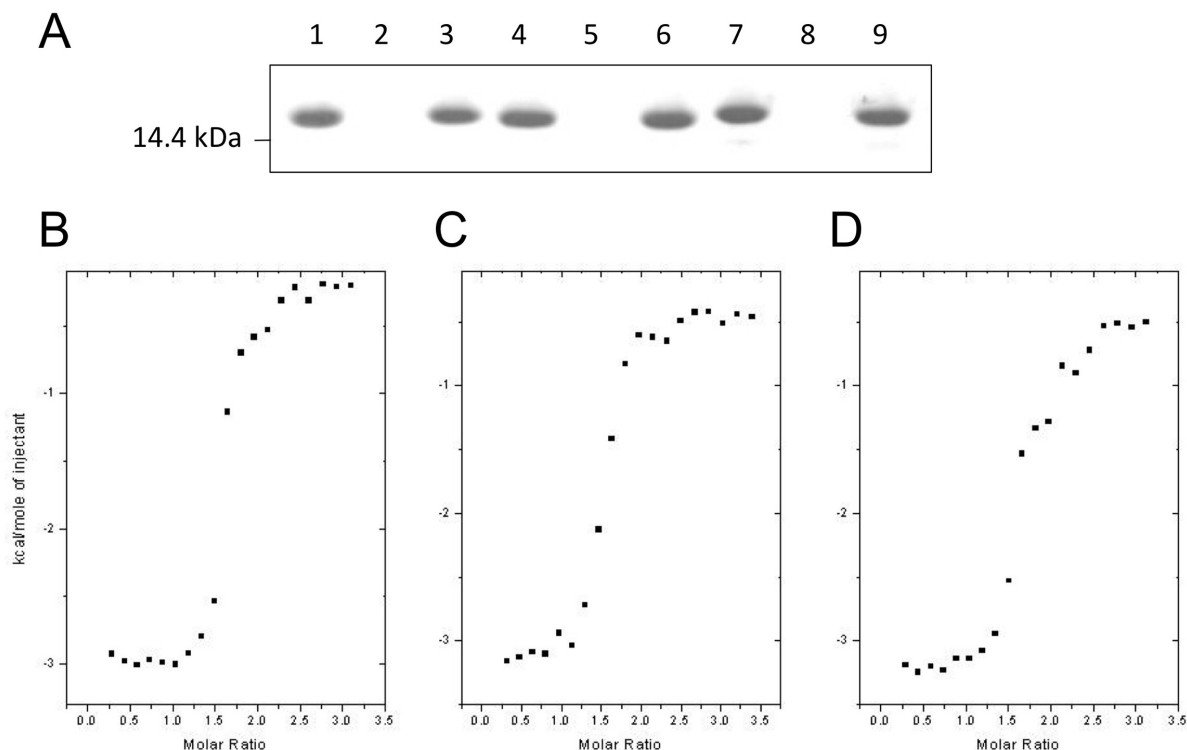

Supplementary Figure 3.  $g(s^*)$  profiles of sedimentation velocity studies of N- $\beta$ GRP in the presence of varying amounts of laminarihexaose. Panel A corresponds to 54  $\mu$ M N- $\beta$ GRP alone (solid line) and in the presence of 1mM laminarihexaose (dotted line); panel B to 234  $\mu$ M N- $\beta$ GRP alone (solid line) and in the presence of 14.1 mM laminarihexaose (dotted line); and panel C to 1.4 mM N- $\beta$ GRP alone (solid line) and in the presence of 26 mM laminarihexaose (dotted line). Sedimentation experiments were performed at 49,000 rpm and 20°C, using absorption optics at 280 nm (A), 300 nm (B) and 308 nm (C). The shift of the dotted line toward higher  $s^*$  values with increasing concentration of laminarihexaose strongly suggests the formation of a weak macro complex of the protein and the hexasaccharide.

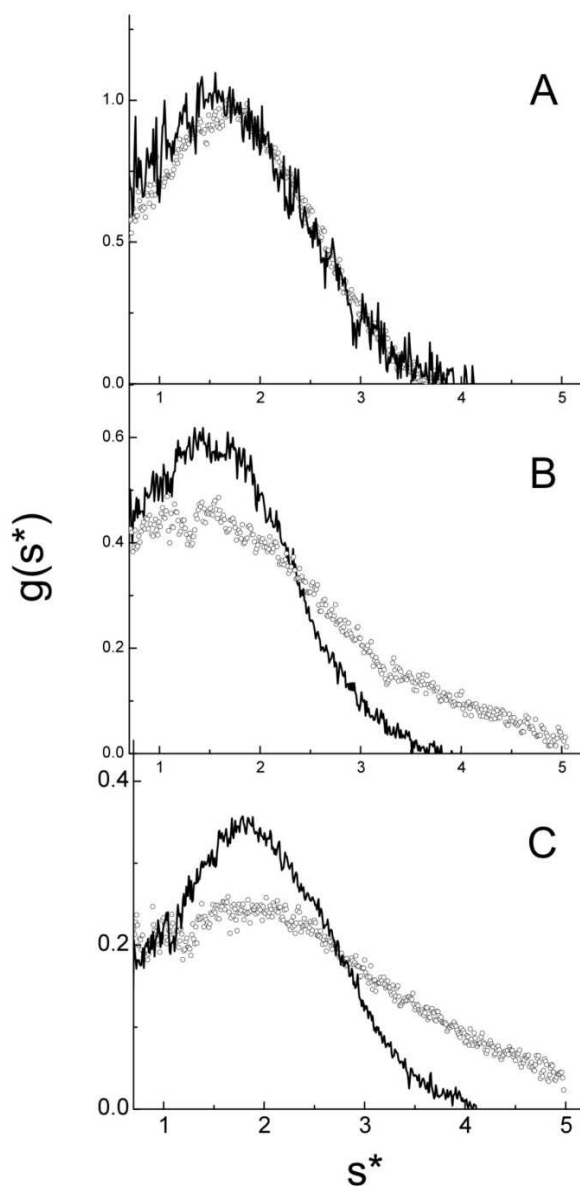

Supplementary Figure 4. Sedimentation velocity profiles of N- $\beta$ GRP:laminarin complex with increasing amounts of laminarin: *L. digitata* laminarin (red); *E. bicyclis* laminarin (blue) added to a constant amount of the protein (26.2  $\mu$ M). *E. bicyclis* laminarin is more branched with  $\beta(1-3)/\beta(1-6)$  ratio of 3 than is *L. digitata* laminarin that has a corresponding value of 7.

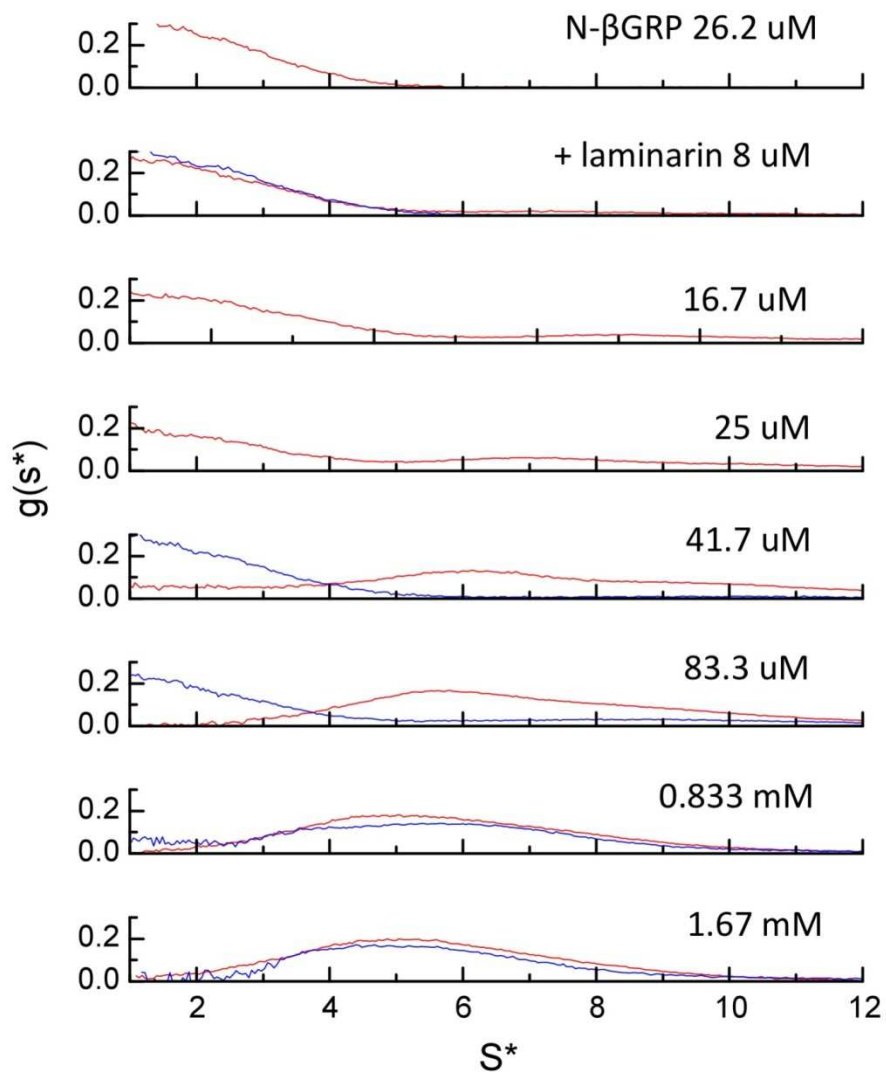

Supplement: Supplementary file 1 [file 4096930]
